# Supplementary material for: The immunometabolite itaconate stimulates OXGR1 to promote mucociliary clearance during the pulmonary innate immune response
Source: PubMed Central journal article supplement (PMC10014103; doi:10.1172/jci160463), 2023-03-15
Supplement: jci-133-160463-s086.pdf [file jci-133-160463-s086.pdf]

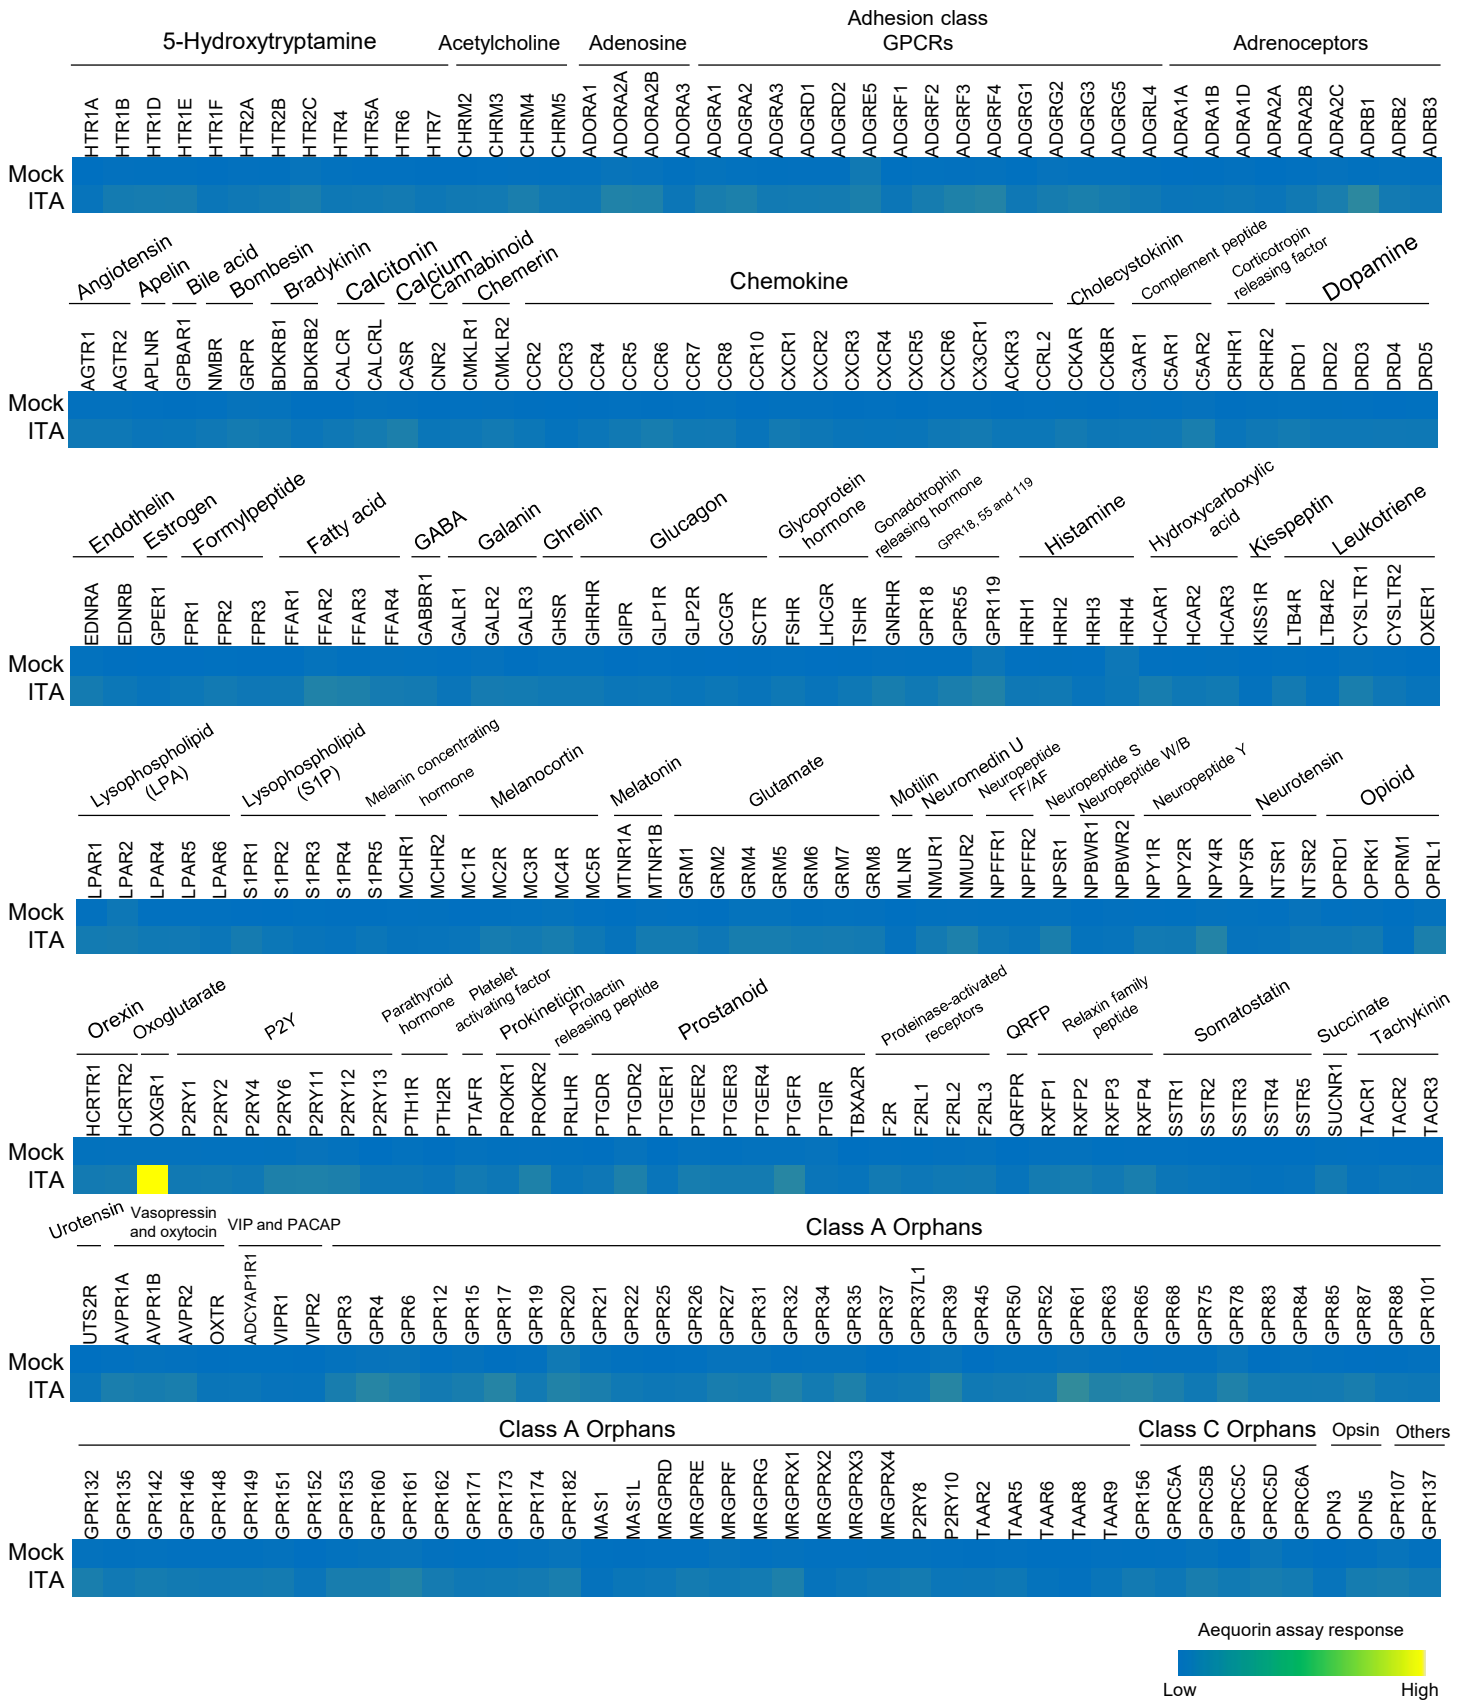

### Supplementary Figure 1. A screen of GPCR receptors discovers OXGR1 as an ITA receptor

The aequorin assay response of cells overexpressing indicated GPCR was quantified and shown as a heatmap. The classification of GPCR is according to the International Union of Basic and Clinical Pharmacology (IUPHAR).

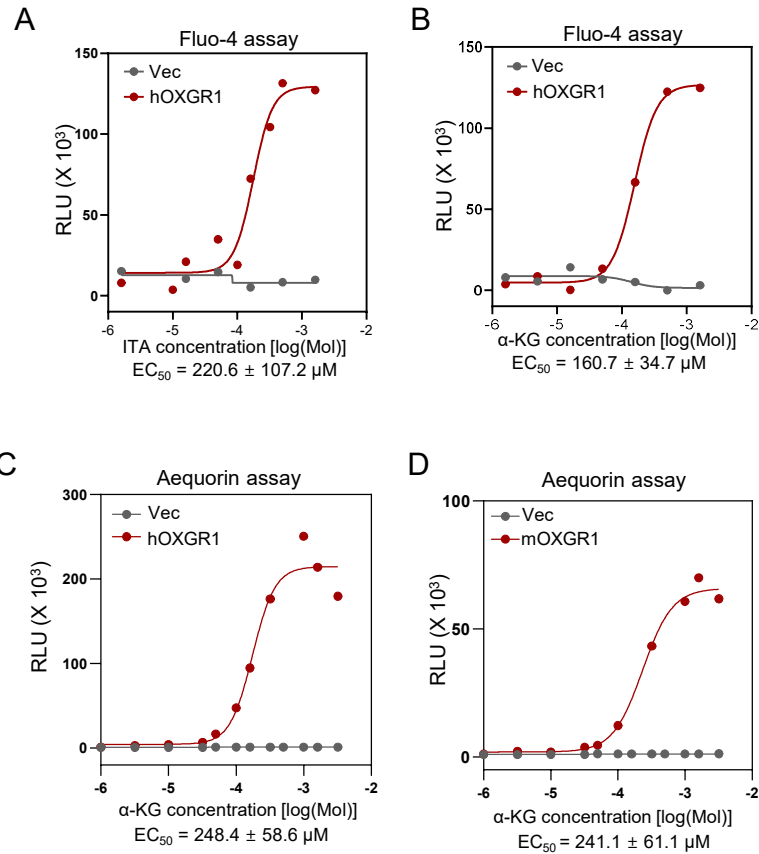

**Supplementary Figure 2. ITA acts as an agonist of OXGR1 to increase cytosolic calcium**

**A, B.** The response of human OXGR1 to ITA or α-KG in HEK293 cells, as determined by the Fluo-4 assay. **C, D.** The response of human and mouse OXGR1 to α-KG in HEK293 cells, as determined by the aequorin assay.

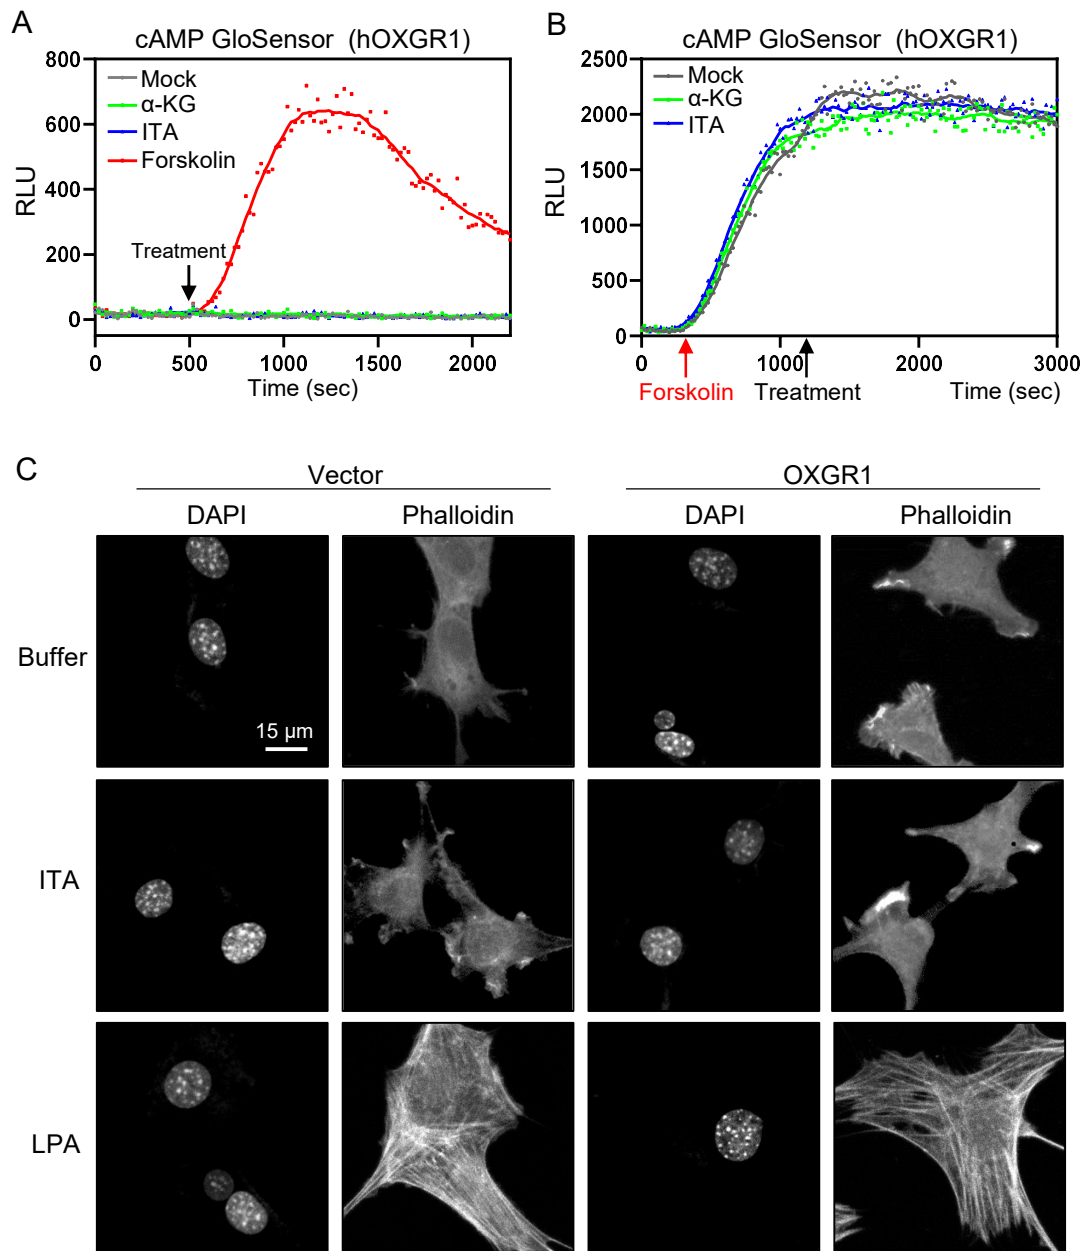

**Supplementary Figure 3. ITA-OXGR1 does not couple to  $G_s$ ,  $G_i$ , or  $G_{12/13}$**

**A, B.** cAMP was measured by cAMP GloSensor assay in HEK293 cells expressing human OXGR1. Forskolin was included as a positive control. **C.** NIH3T3 cells with or without overexpression of human OXGR1 were treated with indicated ligands. The stress fiber was stained with FITC-conjugated phalloidin, and the nucleus was stained by DAPI. LPA was included as a positive control to induce stress fiber formation. Scale bar, 15 μm.

**A**

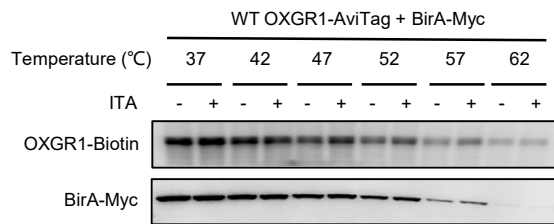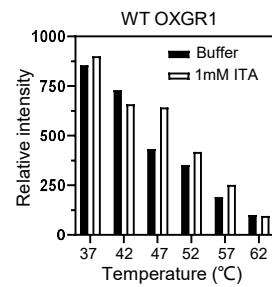

**B**

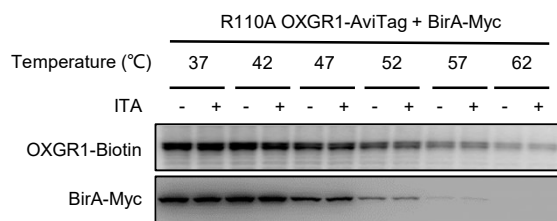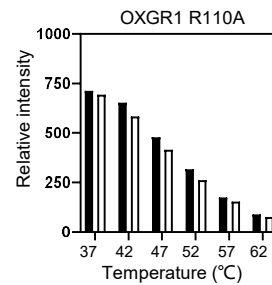

### Supplementary Figure 4. ITA increases the thermostability of OXGR1

Cells expressing Myc-tagged BirA along with AviTag-tagged wildtype (A) or R110A mutant (B) OXGR1 were treated with 1  $\mu$ M biotin for 16 hours in serum-free medium to biotinylate OXGR1 in native conformation. Cells were treated with or without 1mM ITA, lysed, and incubated under different temperatures (from 37 to 62°C) for 3 minutes. Denatured protein was removed by centrifuge. Biotinylated OXGR1 was determined by Western blot and quantified.

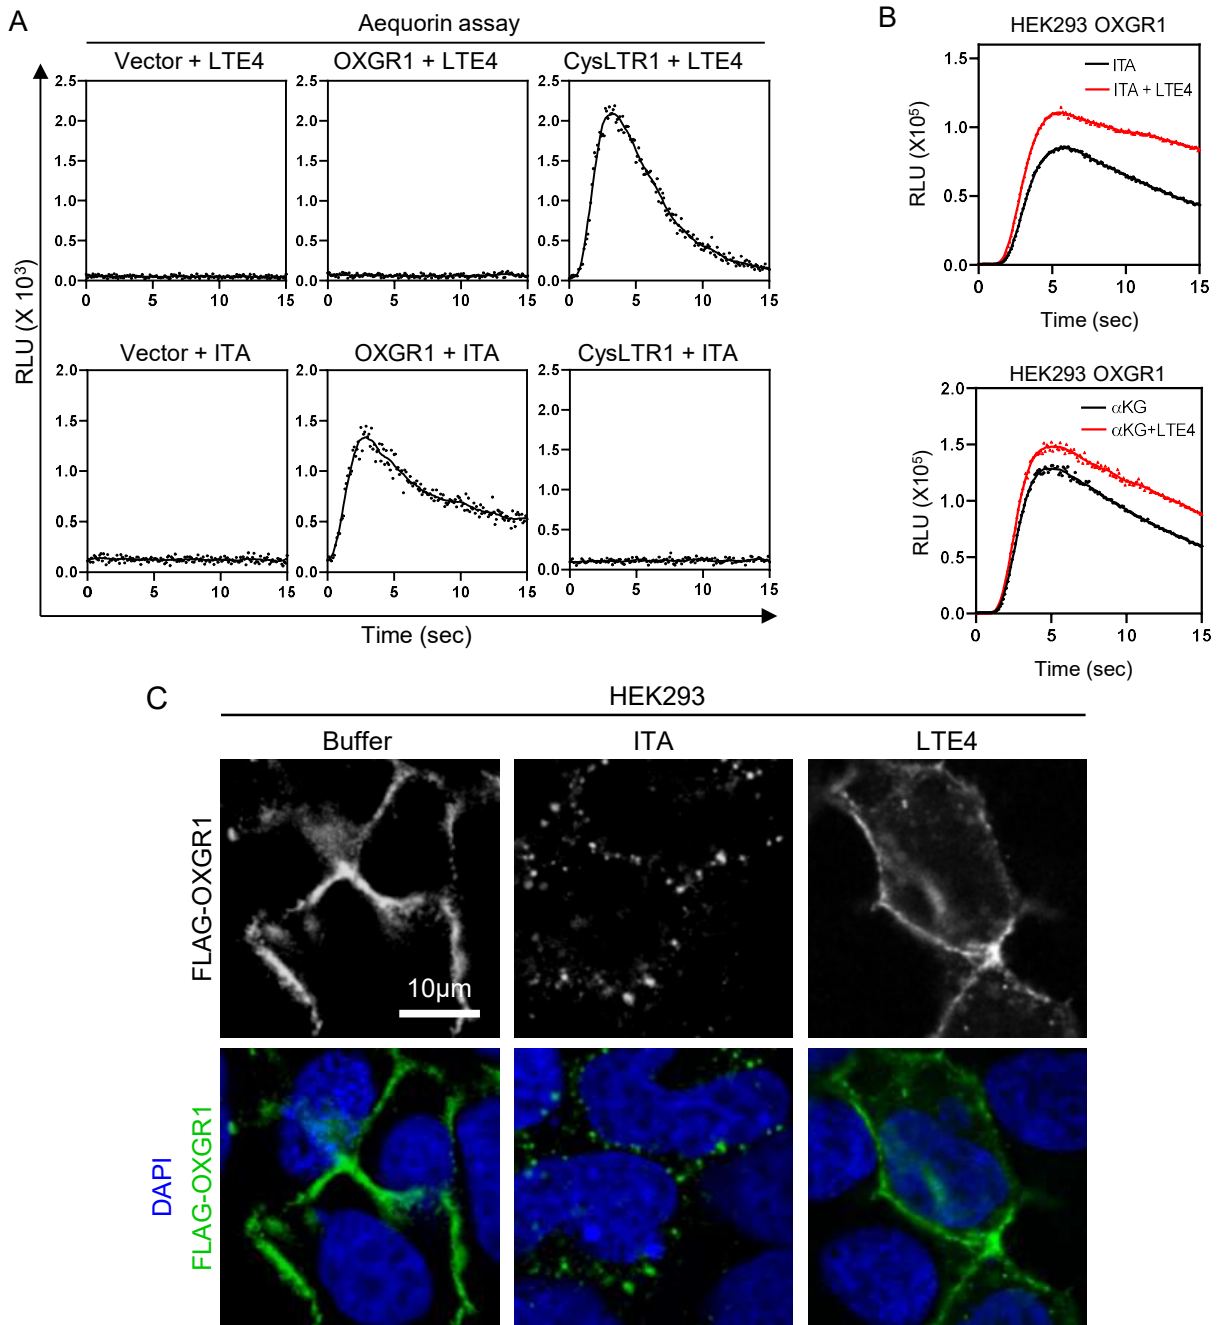

### Supplementary Figure 5. LTE4 is not a direct agonist of OXGR1

**A.** Aequorin assay showing calcium mobilization in HEK293 cells with overexpression of human OXGR1 or CysLTR1 after stimulation by LTE4 and ITA. **B.** Aequorin assay showing calcium mobilization in HEK293 cell with overexpression of human OXGR1 after stimulation by ITA/ $\alpha$ -KG in combination with LTE4. **C.** Endocytosis of Flag-tagged OXGR1 induced by ITA or LTE4 treatment was detected by anti-Flag antibody. Scale bar, 10 $\mu$ m.

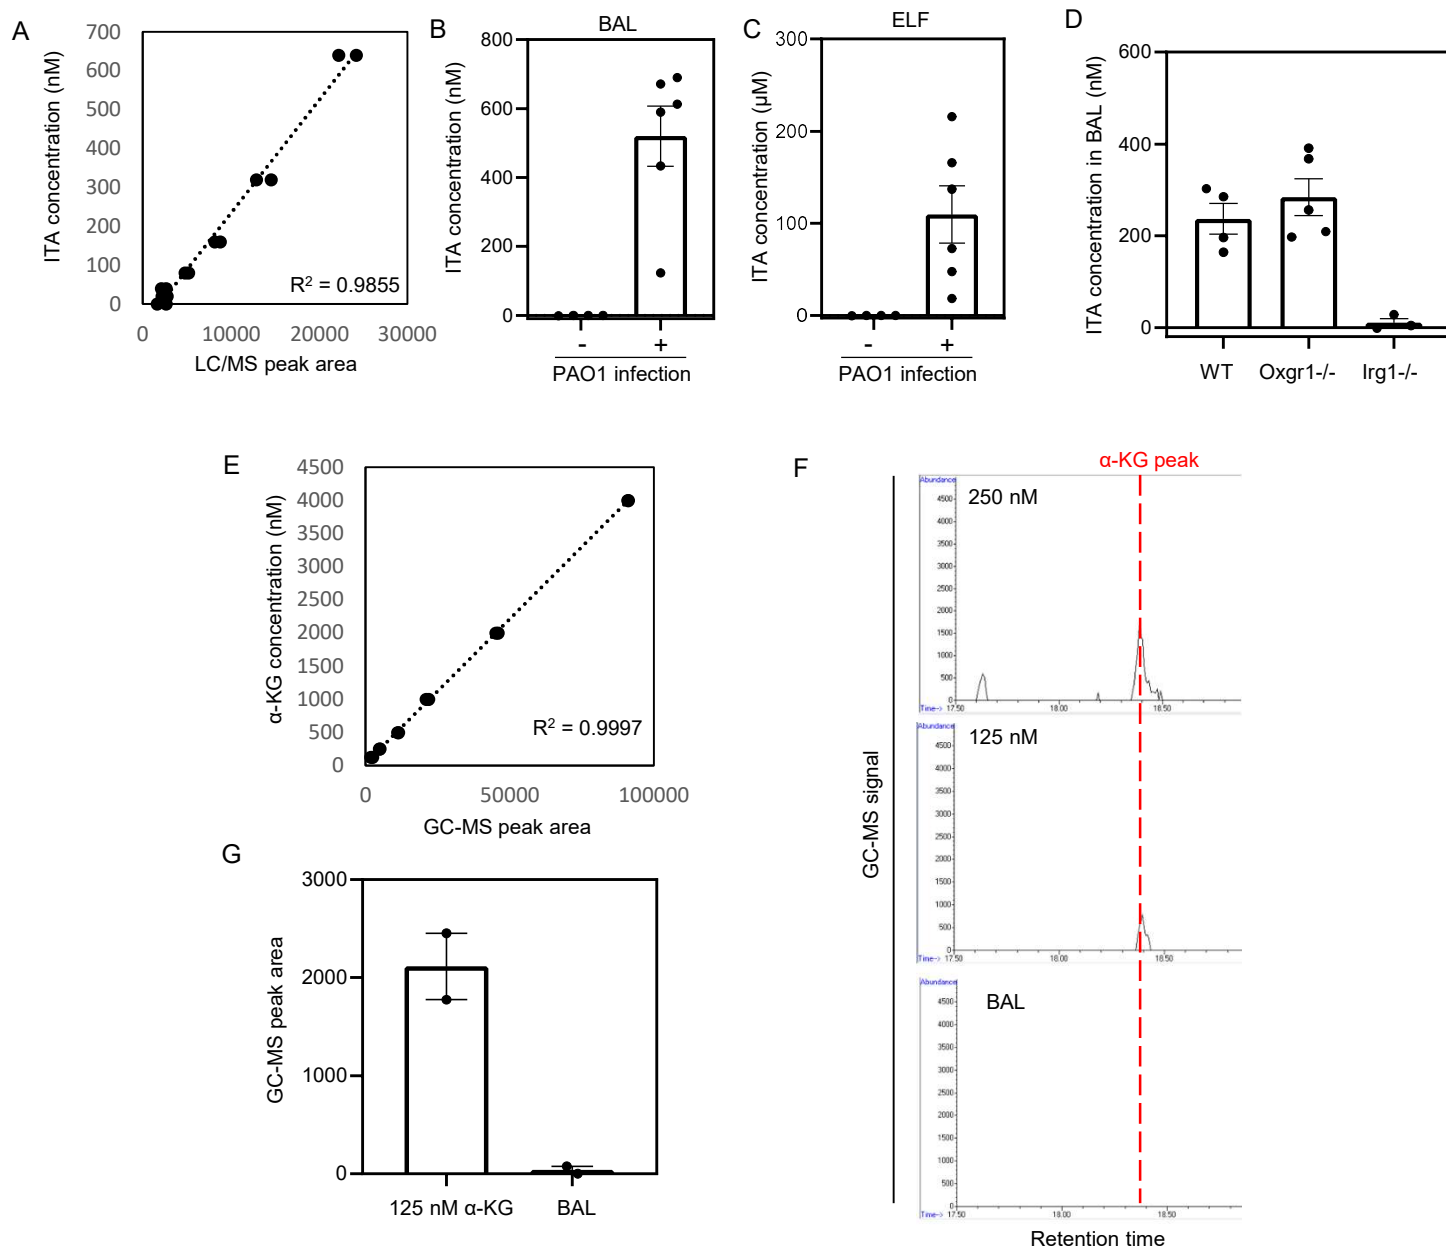

### Supplementary Figure 6. ITA and $\alpha$ -KG concentrations in BAL from mice after *P. aeruginosa* infection

**A.** Standard curve of ITA determined by LC-MS. **B.** ITA concentration in 3 mL BAL of wildtype mice treated with or without PAO1 at 12 hours post infection (n=4-6). **C.** The concentration of ITA in undiluted epithelial lining fluid (ELF) was calculated from BAL by using urea concentration as a marker of dilution. **D.** ITA concentration in 3 mL BAL of mice with indicated genotypes 12 hours post PAO1 infection (n=3-5). **E.** Standard curve of  $\alpha$ -KG determined by GC-MS. **F.** GC-MS chromatogram of  $\alpha$ -KG standards (250 nM, 125 nM) and a concentrated BAL sample. The red line indicates the  $\alpha$ -KG peak. Peak areas were quantified in panel **G**.

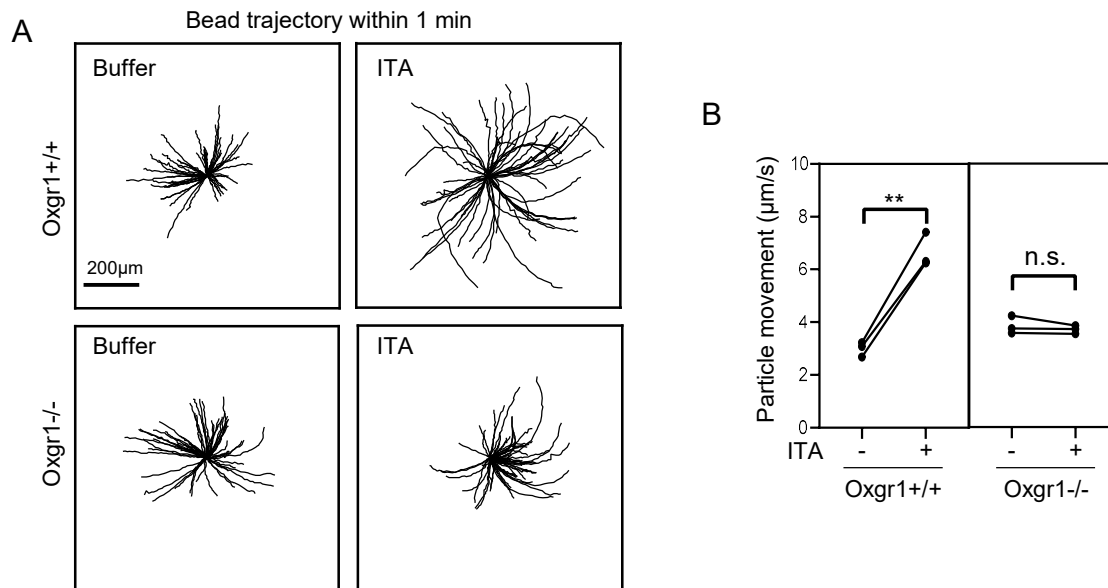

**Supplementary Figure 7. ITA acts as an agonist of OXGR1 to active particle transport**

**A.** The trajectory of 60 individual beads within 1 min in mouse trachea epithelial cell ALI culture with or without 500  $\mu$ M ITA treatment. Scale bar, 200  $\mu$ m. **B.** Bead movement speed was quantified. Each dot represents an independent biological replicate. Significance is determined by paired t-test. \*\* indicates  $p < 0.01$ ; n.s., no significance; error bar, SEM.

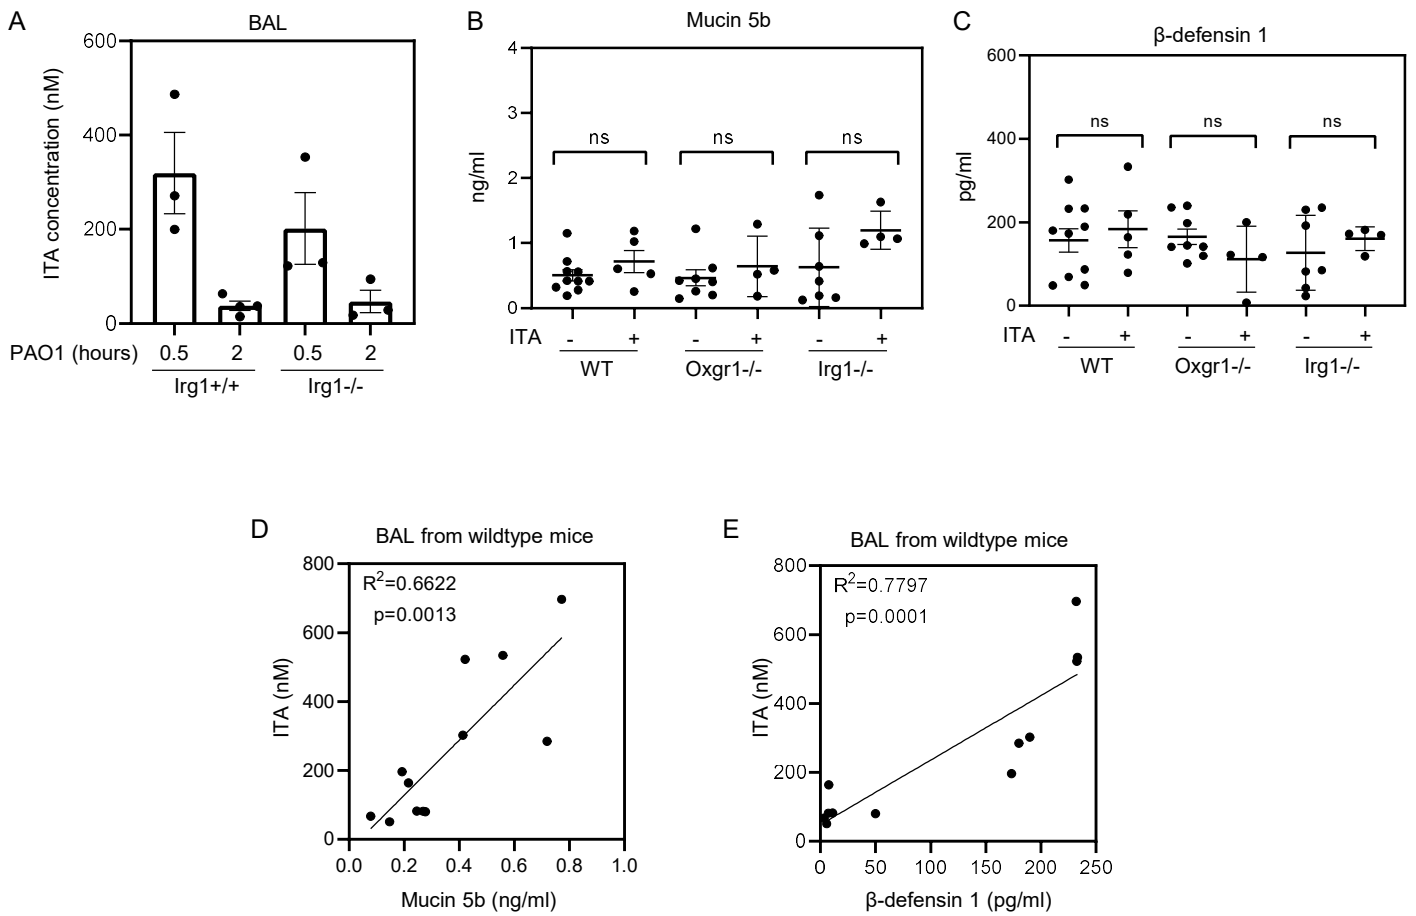

**Supplementary Figure 8. ITA level is positively correlated with Mucin 5b or β-defensin 1 concentration in BAL from mice after *P. aeruginosa* infection**

**A.** ITA concentration in BAL was determined by LC-MS after intranasal delivery of 20 μL saline containing PAO1 and 1mM ITA (n=3-4). **B-C.** Comparison of Mucin 5b (B) and β-defensin1 (C) concentration in BAL of *P. aeruginosa* infected mice with indicated genotypes (n=4-10). Significance is determined by paired t-test. n.s., no significance. **D-E.** Correlation analysis of ITA concentration and Mucin 5b (D) or β-defensin1 concentration (E) in BAL of *P. aeruginosa* infected WT mice.



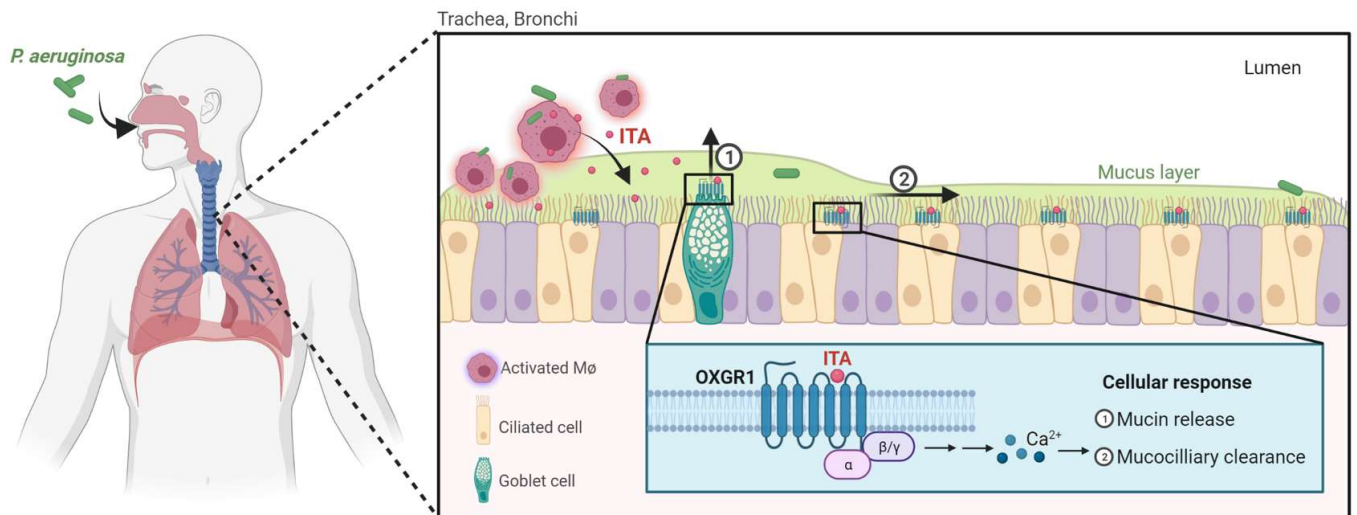

**Supplementary Figure 9. Schematic model of ITA-Oxgr1 signaling in mucociliary clearance**

During airway infection, activated macrophages produce and secrete ITA, which acts through OXGR1 expressed in respiratory epithelial cells to promote mucociliary clearance.
